# Supplementary material for: Learning nonequilibrium statistical mechanics and dynamical phase transitions
Source: Springer Nature journal article supplement (doi:10.1038/s41467-024-45172-8), 2024-02-06
Supplement: 41467_2024_45172_MOESM3_ESM.pdf [file 41467_2024_45172_MOESM3_ESM.pdf]

## Description of Additional Supplementary Files

File Name: Supplementary Data 1

Description: A software package for the manuscript "Learning nonequilibrium statistical mechanics and dynamical phase transitions".
